# Supplementary material for: New ex vivo reporter assay system reveals that σ factors of an unculturable pathogen control gene regulation involved in the host switching between insects and plants
Source: PubMed Central journal article supplement (PMC3831623; doi:10.1002/mbo3.93), 2013-05-31

# Supplementary Figure S1

## 1.1

OY-M :MEFDNIIKTLNEQAGS**EQ**KLTS**QL**IMSFLQNN**K**KIPY**Q**Q**IA**QSL**KE**Q**GI**Q**I**IS**C**ET**Q**A**P**SL**N**EN**P**Q**N**D**T**Q**P**Q**T**NT**T**N**D**D**F**T**D**L**D**SE**L**T**N**AN**L**: 95  
Bacillus :-----M**A**D**K**Q**T**H**E**T**E**L**T**F**D**Q**V**K**E**Q**L**T**E**S**G**K**R**G**V**L**T****E**F**I**A**E**R**M**S**S**F**E**I**E**S**D**Q**V**D**E**Y**E**F**I**G**E**Q**G**V**E**L**I**S**E**NE**E**T**E**D**P**NI**Q**Q**L**AK**A**E: 82  
Chlamydia :----MR**M**D**T**L**D**S**Q**AA**EA**Q**EE**---**I**Q**R**K**L**E**L**V**L**T**L**A**K**D**O**G**E**F**I**T**E**E**I**N**E**L**P**P**S**F**D**T**P**E**Q**I**D**Q**V**L**I**F**L**A**G**M**D**V**Q**V**L**N**D**A**D**V**E**R**Q**K**E**R**K**K**E**A**K**E**L**: 88  
Escherichia :-----M**E**Q**N**P**S**Q**L**K**I**-----L**V**T**R**G**R**E**Q**G**Y**L**T****Y**A**E**V**N**D**H**L**P**E**D**I**V**D**S**D**Q**I**E**D**I**I**Q**M**I**N**D**M**G**I**Q**V**M**E**A**P**D**A**D**L**M**L**A**E**N**T**A**D**E**: 74

## 1.2

OY-M :E**N**T**D**D**N**K**D**-----E**N**D**T**Q**D**SE**E**D**I**Q**D**F**D**I**S**E**E**D**L**I**S**D**E**K**L**I**E**EE**D**E**D**E**K**I**S**K**I**H**S**D**I**K**M**D**S**S**V**R**M**Y**L**K**E**I**G**I**P**L**L**S**L**A**E**E**Q**K**S**I**L**-----: 178  
Bacillus :E**E**F**D**L**N**D---L**S**V**P**P**G**V---K**I**N**D**P**V**R**M**Y**L**K**E**I**G**R**V**N**L**L**S**A**K**E**E**I**A**Y**A**Q**K**I**E**-----: 129  
Chlamydia :E**G**L**A**K**R**S**E**-----G**T**P**D**D**P**V**R**M**Y**L**K**E**M**G**T**V**P**L**L**T**R**E**E**V**E**T**S**K**R**I**E**K**A**Q**V**Q**I**E**R**I**L**R**F**R**Y**S**T**K**E**A**V**S**I**A**Q**Y**L**I**N**G**K**E**R**F**D**K**I**V**S**-----: 168  
Escherichia :D**A**E**A**A**A**Q**V**L**S**S**V**E**S**E**I**G**R**T**T**D**P**V**R**M**Y**M**R**E**M**G**T**V**E**L**L**T**R**E**G**I**D**A**K**R**I**E**D**G**I**N**Q**V**Q**S**V**A**E**Y**P**E**A**I**T**Y**L**L**E**Q**Y**D**R**V**E**A**E**E**A**R**L**S**D**L**I**T**G**F**V**D**P**N: 169

OY-M :-----V**F**L**G**K**Q**A**K**Q**L**A**K**H**K**T**K**E**I**E**S**E**Q**-----: 203  
Bacillus :-----G**D**E**E**-----: 133  
Chlamydia :-----E**K**E**V**E**D**K**T**H**F**L**N**L**L**P**K**L**I**S**L**K**E**D**A**Y**L**E**R**L**L**A**L**K**D**P**A**L**S**K**P**D**Q**A**R**L**N**D**E**L**E**K**R**I**R**T**Q**A**Y**L**R**C**F**H**C**: 236  
Escherichia :A**E**E**D**L**A**P**T**A**T**H**V**G**S**E**L**S**Q**E**D**L**D**D**D**E**D**E**D**E**D**G**D**D**S**A**D**D**D**N**S**I**D**P**E**L**A**R**K**F**A**E**L**R**A**Q**Y**V**V**T**R**D**T**I**K**A**K**G**R**S**H**A**T**A**Q**E**E**I**L**K**L**S**E**V**F**Q**F**R**L**V**P**K: 264

OY-M :-----Q**E**A**H**D**Q**I**E**Q-----: 213  
Bacillus :-----: -  
Chlamydia :R**H**N**V**T**E**D**F**G**E**V**F**K**A**Y**D**S**F**L**Q**L**E**Q**Q**I**N**D**L**K**A**R**A**E**R**N**K**F-----A**A**A**K**L**A**A**A**R**R**K**H**K**R**E**V**A**A**G**R**T**L**E**E**F**K**: 301  
Escherichia :Q**F**D**Y**L**V**N**S**M**R**V**M**D**R**V**R**T**Q**E**R**L**I**M**K**L**C**V**E**Q**C**K**M**P**K**N**F**I**T**L**F**T**G**N**E**T**S**D**T**W**F**N**A**I**A**M**N**K**P**W**S**E**K**L**H**D**V**S**E**V**H**R**A**L**Q**K**Q**Q**I**E**E**T**G**L**T**I**E**Q**V**K: 359

## 2.1

## 2.2

## 2.3

## 2.4

OY-M :-----A**R**R**A**R**D**I**L**V**S**N**Y**R**L**V**S**I**A**K**R**Y**I**G**R**G**I**L**F**D**L**I**Q**E**G**N**M**L**M**R**A**V**D**K**F**D**Y**K**G**F**K**F**S**T**Y**A**T**W**W**I**R**Q**A**I**T**R**A**I**A**D**Q**A**R**T**I**R**I**P**V**: 296  
Bacillus :-----S**K**R**R**L**A**E**A**N**L**R**L**V**S**I**A**K**R**Y**V**G**R**G**M**L**F**D**L**I**Q**E**G**N**M**L**M**K**A**V**E**K**F**D**Y**K**G**Y**K**F**S**T**Y**A**T**W**W**I**R**Q**A**I**T**R**A**I**A**D**Q**A**R**T**I**R**I**P**V**: 213  
Chlamydia :K**D**V**R**M**L**Q**R**W**M**D**K**S**Q**E**A**K**K**E**M**V**E**S**N**L**R**L**V**I**S**I**A**K**K**Y**T**N**R**G**L**S**F**L**D**L**I**Q**E**G**N**M**L**M**K**A**V**E**K**F**E**Y**R**G**Y**K**F**S**T**Y**A**T**W**W**I**R**Q**A**V**T**R**A**I**A**D**Q**A**R**T**I**R**I**P**V: 396  
Escherichia :D**I**N**R**R**M**S**I**G**E**A**K**A**R**R**A**K**K**E**M**V**E**A**N**L**R**L**V**I**S**I**A**K**K**Y**T**N**R**G**L**S**F**L**D**L**I**Q**E**G**N**I**G**L**M**K**A**V**D**K**F**E**Y**R**G**Y**K**F**S**T**Y**A**T**W**W**I**R**Q**A**I**T**R**S**I**A**D**Q**A**R**T**I**R**I**P**V**: 454

## 3.0

## 3.1

## 3.2

OY-M :H**I**V**E**T**I**N**K**M**A**L**C**T**R**K**L**T**Q**K**L**K**K**K**P**T**V**E**L**A**D**K**M**N---I**S**A**E**K**I**R**S**I**Q**Y**I**E**K**K**P**I**S**L**E**A**P**A**R**E**N**E**D**E**T**S**I**G**D**F**I**S**D**P**N**I**L**S**P**H**E**Y**M**M**K**E**V**T**Q**K**L**I**D**: 389  
Bacillus :H**M**V**E**T**I**N**K**L**I**R**V**Q**R**L**L**Q**D**L**G**R**E**P**T**E**E**E**I**A**E**D**M**D---L**T**P**E**K**V**R**E**L**K**I**A**Q**E**P**V**S**L**E**T**P**I**G**E**--E**D**D**S**H**I**G**D**F**I**E**D**Q**E**A**T**S**P**S**D**H**A**A**Y**E**L**L**K**E**Q**L**E**: 304  
Chlamydia :H**M**I**E**T**I**N**K**V**L**R**G**A**K**K**L**M**M**E**T**C**K**E**P**T**E**E**L**G**E**E**L**G---F**P**D**R**V**R**E**I**Y**K**I**A**Q**H**P**I**S**L**Q**A**E**V**G**D**--G**G**E**S**S**F**G**D**F**L**E**D**T**A**V**E**S**P**A**E**A**T**G**Y**S**M**L**K**D**K**M**K**: 487  
Escherichia :H**M**I**E**T**I**N**K**L**N**R**I**S**R**Q**M**L**Q**E**M**G**R**E**P**T**E**E**L**A**E**R**M**L---M**P**E**D**K**I**R**K**V**L**K**I**A**K**E**P**I**S**M**E**T**P**I**G**D---D**E**D**S**H**I**G**D**F**I**E**D**T**T**L**E**L**P**L**D**S**A**T**T**E**S**L**R**A**A**T**H**: 545

## 4.1

## 4.2

OY-M :E**V**L**E**N**T**L**T**D**R**E**E**K**V**L**K**M**R**Y**G**L**L**D**G**R**T**H**T**L**E**E**V**G**T**L**F**G**V**T**R**E**R**I**R**Q**I**E**S**K**A**L**R**R**L**R---T**P**A**K**Q**S**R**K**L**S**Y**H**N**H**K-----: 460  
Bacillus :D**V**L**D**-**T**L**T**D**R**E**E**N**V**L**R**L**R**F**G**L**D**D**G**R**T**R**T**L**E**E**V**G**K**V**F**G**V**T**R**E**R**I**R**Q**I**E**A**K**A**L**R**K**L**R---H**P**S**R**S**K**R**L**K**D**F**L**E-----: 371  
Chlamydia :E**V**L**K**-**T**L**T**D**R**E**R**F**V**L**I**H**R**F**G**L**L**D**G**R**P**K**T**L**E**E**V**G**S**A**F**N**V**T**R**E**R**I**R**Q**I**E**A**K**A**L**R**K**M**R---H**P**I**R**S**K**Q**L**R**A**F**L**D**L**E**E**E**K**I**G**S**G**K**I**K**S**Y**K**N: 571  
Escherichia :D**V**L**A**-**G**L**T**A**R**E**A**K**V**L**R**M**R**F**G**L**D**M**N**T**D**Y**T**L**E**E**V**G**K**Q**F**D**V**T**R**E**R**I**R**Q**I**E**A**K**A**L**R**K**L**R---H**P**S**R**S**E**V**L**R**S**F**L**D**D**-----: 613

# Supplementary Figure S2

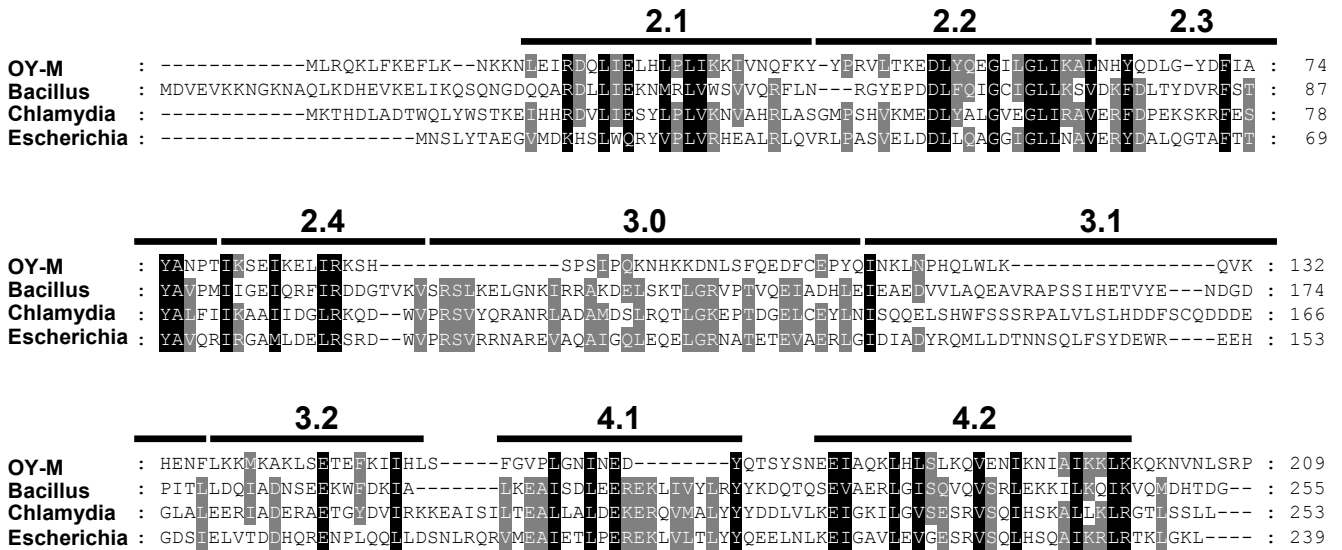

# Supplementary Figure S3

Insect host

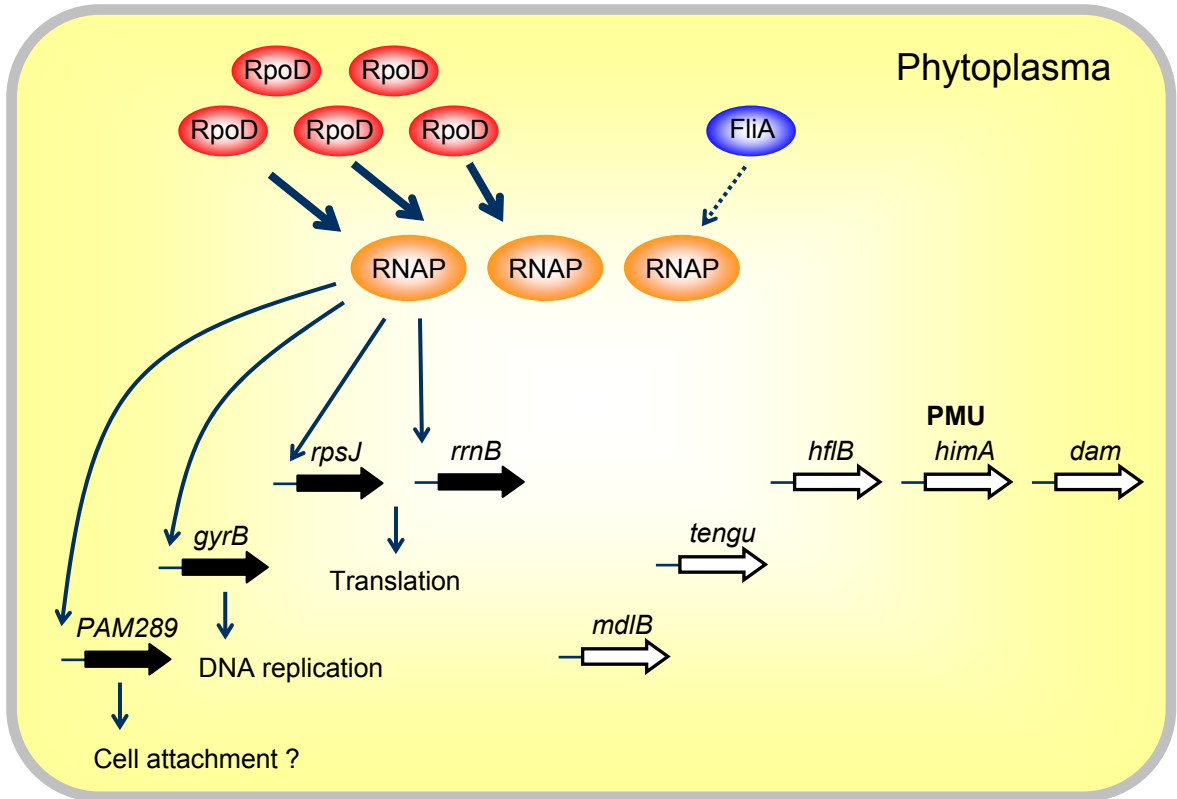

Plant host

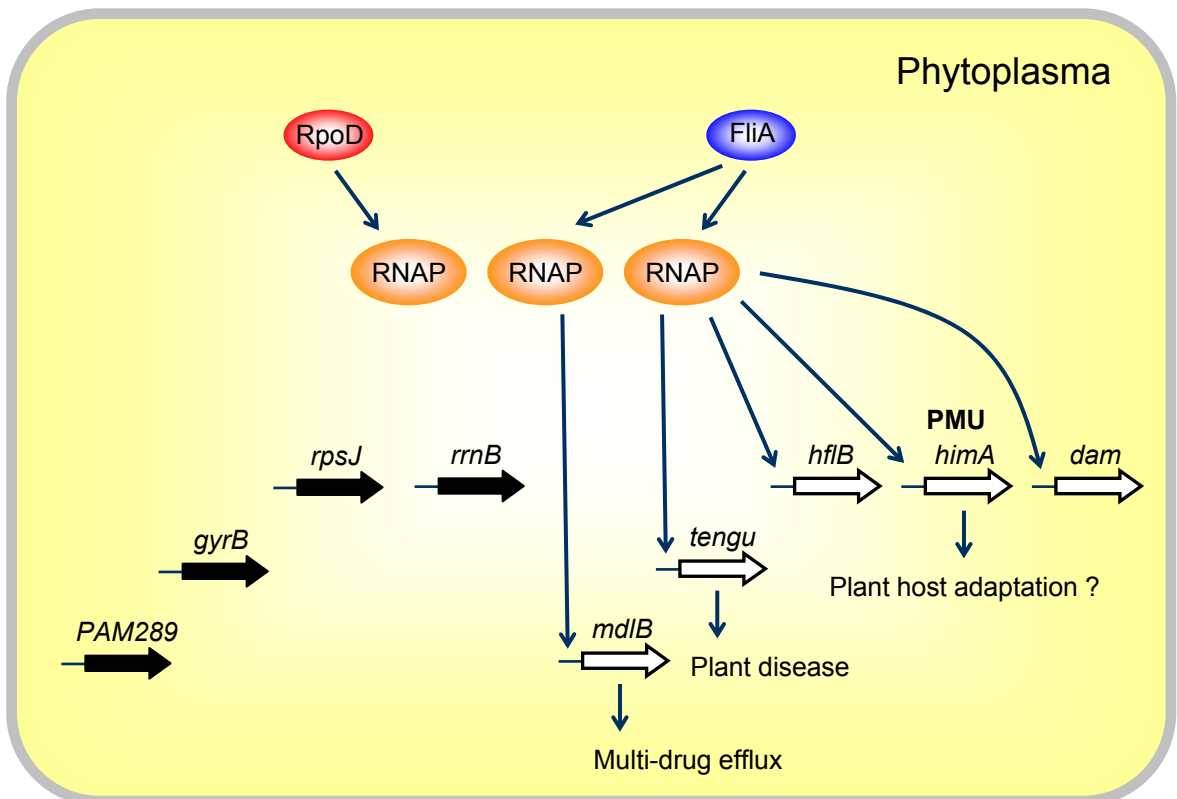

Supplement: mbo30002-0553-sd2.pdf [file mbo30002-0553-sd2.pdf]
